# Supplementary material
Source: PubMed Central journal article supplement (PMC7591377)
Supplement: Supp_TableS2.pdf [file Supp_TableS2.pdf]

SUPPLEMENTARY TABLE S2. DISCRIMINANT RATIO VALUES OF THE ASSESSED GLUCOSE VARIABILITY METRICS AND THE GLUCOSE CONTROL QUALITY INDICES

| <i>Metrics</i>                        | <i>DR median (IQR)</i> |                      |
|---------------------------------------|------------------------|----------------------|
|                                       | <i>JDRF</i>            | <i>REPLACE-IHART</i> |
| DR of glucose variability metrics     |                        |                      |
| MAG                                   | 2.98 (1.64–3.67)       | 2.75 (1.47–4.32)     |
| GVP                                   | 2.20 (1.39–3.01)       | 2.04 (1.42–2.73)     |
| LI                                    | 2.11 (1.20–3.10)       | 2.28 (1.66–4.15)     |
| AARC                                  | 1.95 (1.41–2.64)       | 1.78 (1.16–2.44)     |
| J-index                               | 1.85 (1.34–2.59)       | 2.05 (1.48–2.72)     |
| ADRR                                  | 1.81 (1.40–2.28)       | 1.78 (1.48–2.22)     |
| CONGA <sub>1</sub>                    | 1.73 (1.37–2.18)       | 1.79 (1.20–2.51)     |
| SD                                    | 1.62 (1.21–1.99)       | 1.66 (1.22–2.12)     |
| MAGE                                  | 1.56 (1.22–1.93)       | 1.68 (1.40–2.08)     |
| MODD                                  | 1.47 (1.11–1.98)       | 1.75 (1.35–2.12)     |
| CV                                    | 1.33 (1.08–1.63)       | 1.50 (1.13–1.94)     |
| DR of glucose control quality indices |                        |                      |
| DR of metrics for hypoglycemia        |                        |                      |
| PT (BG <50 mg/dL)                     | 2.33 (1.06–6.35)       | 2.43 (1.32–4.82)     |
| PT (BG <54 mg/dL)                     | 2.15 (1.08–5.28)       | 2.24 (1.27–4.18)     |
| LBG1                                  | 1.93 (1.15–3.44)       | 1.99 (1.23–2.84)     |
| GRADE <sub>hypo</sub>                 | 1.79 (1.04–4.46)       | 1.91 (1.14–3.60)     |
| PT (BG <70 mg/dL)                     | 1.51 (1.07–2.77)       | 1.94                 |
| Metrics for overall glycemic control  |                        |                      |
| <i>M</i> -value                       | 2.00 (1.30–2.94)       | 2.13 (1.52–3.24)     |
| IGC                                   | 1.92 (1.27–2.93)       | 1.87 (1.33–2.71)     |
| RI                                    | 1.87 (1.32–2.72)       | 1.80 (1.52–2.74)     |
| PGS                                   | 1.71 (1.44–2.02)       | 1.70 (1.41–1.98)     |
| GRADE                                 | 1.67 (1.30–2.27)       | 1.85 (1.40–2.43)     |
| PTIR (70–180 mg/dL)                   | 1.63 (1.31–2.02)       | 1.79 (1.46–2.24)     |
| PTIR (70–160 mg/dL)                   | 1.63 (1.31–2.02)       | 1.79 (1.46–2.23)     |
| PTIR (54–180 mg/dL)                   | 1.61 (1.32–2.09)       | 1.85 (1.48–2.21)     |
| PTIR (70–140 mg/dL)                   | 1.58 (1.36–1.85)       | 1.70 (1.35–1.99)     |
| PTIR (54–140 mg/dL)                   | 1.56 (1.31–2.09)       | 1.64 (1.37–2.00)     |
| Metrics for hyperglycemia             |                        |                      |
| HbG1                                  | 1.83 (1.34–2.72)       | 2.19 (1.48–2.79)     |
| PT (BG >180 mg/dL)                    | 1.59 (1.27–2.09)       | 1.80 (1.44–2.25)     |
| PT (BG >160 mg/dL)                    | 1.56 (1.32–1.97)       | 1.75 (1.41–2.09)     |
| PT (BG >140 mg/dL)                    | 1.54 (1.29–1.85)       | 1.62 (1.36–2.01)     |
| GRADE <sub>hyper</sub>                | 1.50 (1.24–1.86)       | 1.72 (1.11–2.82)     |

They were calculated in two data sets (the main data set: JDRF; the supporting data set: REPLACE-IHART. BG, blood glucose; JDRF, Juvenile Diabetes Research Foundation; PT, %time; RI, risk index.
